# Supplementary material
Source: PubMed Central journal article supplement (PMC1305669)
Supplement: biophysj_104.057745_2.pdf [file biophysj_104.057745_2.pdf]

## Appendix B

### The Berkeley Madonna model:

|                                                   |                                                                                                                                                                                   |
|---------------------------------------------------|-----------------------------------------------------------------------------------------------------------------------------------------------------------------------------------|
| $[Ca^{2+}]_T, [Ca^{2+}]_{t=0}$                    | total $Ca^{2+}$ concentration (calc.), free $Ca^{2+}$ concentration (sim.) and, initial free $Ca^{2+}$ concentration (measured with $Ca^{2+}$ -sensitive electrode), respectively |
| $[Mg^{2+}]_T, [Mg^{2+}]_{t=0}$                    | total $Mg^{2+}$ concentration (known), free $Mg^{2+}$ concentration (sim.) and, initial free $Mg^{2+}$ concentration (calc.), respectively                                        |
| $[DMn]_T, [DMn]_{t=0}$                            | total DMn concentration (measured with photospectrometer), free DMn concentration (sim.) and, initial DMn concentration (calc.), respectively                                     |
| $K_{d(CaDMn)}$                                    | equilibrium dissociation constant of DMn with $Ca^{2+}$ (fitted in set of initial experiments*)                                                                                   |
| $k_{on(CaDMn)}$                                   | association rate constant of DMn with $Ca^{2+}$ (calculated = $k_{off(CaDMn)} / K_{d(CaDMn)}$ )                                                                                   |
| $k_{off(CaDMn)}$                                  | dissociation rate constant of DMn with $Ca^{2+}$ (fitted in set of initial experiments*)                                                                                          |
| $K_{d(MgDMn)}$                                    | equilibrium dissociation constant of DMn with $Mg^{2+}$ (fitted)                                                                                                                  |
| $k_{on(MgDMn)}$                                   | association rate constant of DMn with $Mg^{2+}$ (calculated = $k_{off(MgDMn)} / K_{d(MgDMn)}$ )                                                                                   |
| $k_{off(MgDMn)}$                                  | dissociation rate constant of DMn with $Mg^{2+}$ (fitted)                                                                                                                         |
| $[CaDMn]_{t=0}, [CaDMn]_{t=0}$                    | concentration of $Ca^{2+}$ -DMn complex (sim.), and initial concentration (calc), resp.                                                                                           |
| $[MgDMn]_{t=0}, [MgDMn]_{t=0}$                    | concentration of $Mg^{2+}$ -DMn complex (sim.), and initial concentration (calc), resp.                                                                                           |
| $[PP1], [PP2]$                                    | photoproduct concentration either formed by uncaging of CaDMn (PP1) or DMn or MgDMn (PP2), initial values are 0, (sim.)                                                           |
| $K_{d(CaPP1)}, K_{d(CaPP2)}$                      | equilibrium dissociation constant of PP1 and PP2, respectively, with $Ca^{2+}$ (PP1 is fitted in set of initial experiments*, PP2 is fitted later)                                |
| $k_{off(CaPP1)}, k_{off(CaPP2)}$                  | equilibrium dissociation constant of PP1 and PP2, respectively, with $Ca^{2+}$ (PP1 is fitted in set of initial experiments*, PP2 is fitted later)                                |
| $K_{d(MgPP)}$                                     | equilibrium dissociation constant of both PP1 and PP2 with $Mg^{2+}$ (fitted)                                                                                                     |
| $k_{off(MgPP)}$                                   | equilibrium dissociation constant of both PP1 and PP2 with $Mg^{2+}$ (fitted)                                                                                                     |
| $[CaPP1], [CaPP2]$                                | concentration of $Ca^{2+}$ -PP1 complex (sim.) and $Ca^{2+}$ -PP2 complex (sim.), resp.                                                                                           |
| $[MgPP1], [MgPP2]$                                | concentration of $Mg^{2+}$ -PP1 complex (sim.) and $Mg^{2+}$ -PP2 complex (sim.), resp.                                                                                           |
| $\alpha, x$                                       | fraction of DM-n to be photolysed (fitted per trace), and its fraction that photolyzes with the fast time constant (fitted in set of initial experiments*).                       |
| $[DMn]_f, [CaDMn]_f, [MgDMn]_f$                   | total DMn concentration., total CaDMn concentration and, total MgDMn concentrations that photolyses with the fast timeconstant (all calc.), respectively                          |
| $[DMn]_s, [CaDMn]_s, [MgDMn]_s$                   | total DMn concentration., total CaDMn concentration and, total MgDMn concentrations that photolyses with the slow timeconstant (all calc.), respectively                          |
| $\tau_{fast}$                                     | time constant of fast photolysis (fitted in set of initial experiments*)                                                                                                          |
| $\tau_{slow}$                                     | time constant of slow photolysis (fitted in set of initial experiments*)                                                                                                          |
| $J_{fast(DMn)}, J_{fast(CaDMn)}, J_{fast(MgDMn)}$ | flux/rate of fast uncaging to the various photoproducts and complexes of DMn, CaDMn and, MgDMn, respectively (all simulated)                                                      |

|                                                   |                                                                                                                                                                                                                                                                |
|---------------------------------------------------|----------------------------------------------------------------------------------------------------------------------------------------------------------------------------------------------------------------------------------------------------------------|
| $J_{slow(DMn)}, J_{slow(CaDMn)}, J_{slow(MgDMn)}$ | flux/rate of slow uncaging to the various photoproducts and complexes of DMn, CaDMn and, MgDMn, respectively (all simulated)                                                                                                                                   |
| $t_{flash}$                                       | moment of initiation of photolysis (in these simulations 0)                                                                                                                                                                                                    |
| $[D]_T$                                           | total dye ( $Ca^{2+}$ -indicator) concentration = 100 $\mu$ M OGB-5N                                                                                                                                                                                           |
| $[D]$                                             | concentration of free dye (sim.)                                                                                                                                                                                                                               |
| $[CaD]$                                           | concentration of $Ca^{2+}$ -dye complex (sim.)                                                                                                                                                                                                                 |
| $K_{d(D)}$                                        | equilibrium dissociation constant of the dye, OGB-5N = 29.3 $\mu$ M (measured with $Ca^{2+}$ solutions of known $[Ca^{2+}]$ )                                                                                                                                  |
| $k_{on(D)}$                                       | association rate constant of the dye, OGB-5N with $Ca^{2+} = 2.6 \cdot 10^8 \text{ M}^{-1}\text{s}^{-1}$ (calculated = $k_{off(D)} / K_{d(D)}$ )                                                                                                               |
| $k_{off(D)}$                                      | dissociation rate constant of the dye, OGB-5N with $Ca^{2+} = 7.5 \times 10^3 \text{ s}^{-1}$ or $8.7 \times 10^3 \text{ s}^{-1}$ depending on the lot used (measured, derived from relaxation time constant of $Ca^{2+}$ -dye complex after $Ca^{2+}$ -pulse) |
| $F_{ratio}$                                       | ratio $F_{max} / F_{min}$ for the dye, OGB-5N = 10.8 or 40.0 depending on the lot used (measured with $Ca^{2+}$ solutions of known $[Ca^{2+}]$ )                                                                                                               |

DMn can be replaced everywhere for NP-EGTA to represent the uncaging model for NP-EGTA

### The scheme of uncaging $Ca^{2+}$ and $Mg^{2+}$ and detecting $Ca^{2+}$

#### Pre flash

The kinetic reactions for the different fractions before photolysis are:

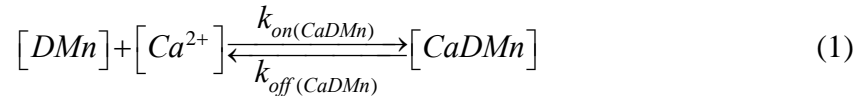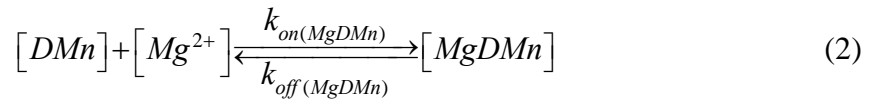

#### Flash photolysis of DM-nitrophen

Of the total DM-nitrophen (DMn) concentration ( $[DMn]_T = [DMn], [CaDMn], [MgDMn]$ ) a certain fraction  $\alpha$  photolyzes. The flash energy of the UV laser determines the total proportion ( $\alpha$ ). Of this fraction  $\alpha$  a fraction ( $x$ ) photolyzes rapidly ( $[DM]_f, [CaDMn]_f, [MgDMn]_f$ ) while a fraction ( $1-x$ ) photolyzes slowly ( $[DMn]_s, [CaDMn]_s, [MgDMn]_s$ )

$$[DMn]_f = \alpha x [DMn] \quad (3)$$

$$[CaDMn]_f = \alpha x [CaDMn] \quad (4)$$

$$[MgDMn]_f = \alpha x [MgDMn] \quad (5)$$

$$[DMn]_s = \alpha (1-x) [DMn] \quad (6)$$

$$[CaDMn]_s = \alpha (1-x) [CaDMn] \quad (7)$$

$$[MgDMn]_s = \alpha (1-x) [MgDMn] \quad (8)$$

Where  $x=1$  for one uncaging timeconstant and  $x \leq 1$  for two uncaging timeconstants.

After the flash the affected DMn molecules transition into photoproducts of DMn ( $[PP2]$ ), CaDMn ( $[CaPP1]$  and  $[PP1]$ ) and, MgDMn ( $[MgPP2]$  and  $[PP2]$ ) with time constants  $\tau_{fast}$  and  $\tau_{slow}$ :

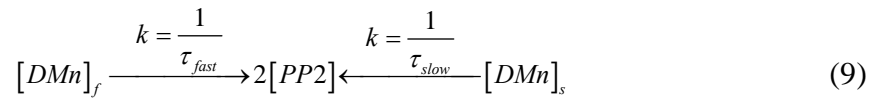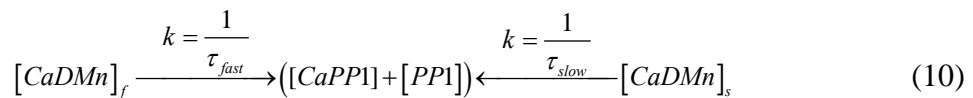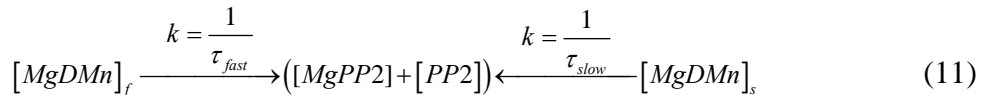

In eq. 18 as Ca<sup>2+</sup>-free DMn is broken down into PP2 as described earlier by {Ayer, 1999 192 /id;Kaplan, 1988 179 /id}. However, based on our experiments it also be broken down into PP1.

Compared to DMn, the individual photoproducts may have different dissociation rate constants for Ca<sup>2+</sup> and Mg<sup>2+</sup> (leading to alternate affinities):

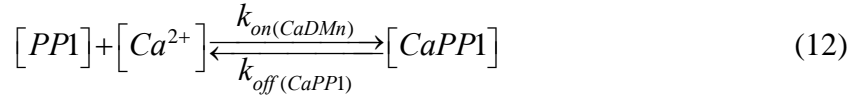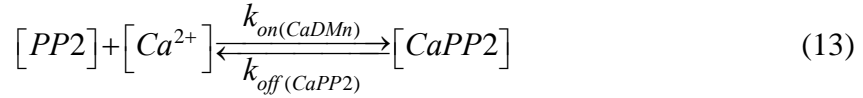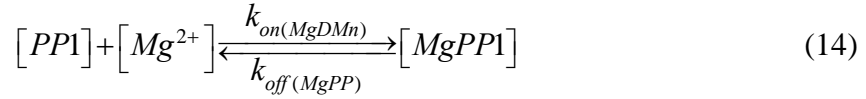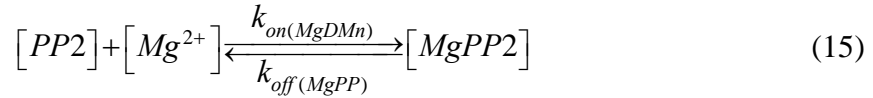

where we can note that the dissociation rates for PP1 and PP2 to  $Mg^{2+}$  are similar ( $k_{offMgPP}$ )

whereas for  $Ca^{2+}$  they depend on the model used:

$$\text{model (a): } k_{offCaPP1} = k_{offCaPP2} \quad (16)$$

$$\text{model (b): } k_{offCaPP1} \neq k_{offCaPP2} \quad (17)$$

*Determining  $[Ca^{2+}]$  with a  $Ca^{2+}$ -indicator*

The kinetic reaction for the fluorescent dye (D) is:

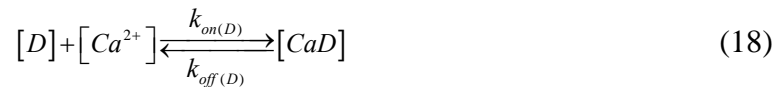

In the presence of both DMn and the dye there is a complete model for uncaging  $Ca^{2+}$  and  $Mg^{2+}$  and detecting  $Ca^{2+}$ .

**Equations for uncaging  $\text{Ca}^{2+}$  and  $\text{Mg}^{2+}$  and detecting  $\text{Ca}^{2+}$** 

For DMn

$$\frac{d[\text{CaDMn}]}{dt} = k_{on(\text{CaDMn})} \cdot [\text{Ca}^{2+}] \cdot [\text{DMn}] - k_{off(\text{CaDMn})} \cdot [\text{CaDMn}] - J_{fast(\text{CaDMn})} - J_{slow(\text{CaDMn})} \quad (19)$$

$$\frac{d[\text{MgDMn}]}{dt} = k_{on(\text{MgDMn})} \cdot [\text{Mg}^{2+}] \cdot [\text{DMn}] - k_{off(\text{MgDMn})} \cdot [\text{MgDMn}] - J_{fast(\text{MgDMn})} - J_{slow(\text{MgDMn})} \quad (20)$$

$$\begin{aligned} \frac{d[\text{DMn}]}{dt} = & -k_{on(\text{CaDMn})} \cdot [\text{Ca}^{2+}] \cdot [\text{DMn}] + k_{off(\text{CaDMn})} \cdot [\text{CaDMn}] \\ & - k_{on(\text{MgDMn})} \cdot [\text{Mg}^{2+}] \cdot [\text{DMn}] + k_{off(\text{MgDMn})} \cdot [\text{MgDMn}] - J_{fast(\text{DMn})} - J_{slow(\text{DMn})} \end{aligned} \quad (21)$$

and

$$J_{fast(\text{DMn})} = \frac{d[\text{DMn}]_f}{dt} = \frac{[\text{DMn}]_f}{\tau_{fast}} \cdot T_{flash} \quad (22)$$

$$J_{slow(\text{DMn})} = \frac{d[\text{DMn}]_s}{dt} = \frac{[\text{DMn}]_s}{\tau_{slow}} \cdot T_{flash} \quad (23)$$

$$J_{fast(\text{CaDMn})} = \frac{d[\text{CaDMn}]_f}{dt} = \frac{[\text{CaDMn}]_f}{\tau_{fast}} \cdot T_{flash} \quad (24)$$

$$J_{slow(\text{CaDMn})} = \frac{d[\text{CaDMn}]_s}{dt} = \frac{[\text{CaDMn}]_s}{\tau_{slow}} \cdot T_{flash} \quad (25)$$

$$J_{fast(\text{MgDMn})} = \frac{d[\text{MgDMn}]_f}{dt} = \frac{[\text{MgDMn}]_f}{\tau_{fast}} \cdot T_{flash} \quad (26)$$

$$J_{slow(\text{MgDMn})} = \frac{d[\text{MgDMn}]_s}{dt} = \frac{[\text{MgDMn}]_s}{\tau_{slow}} \cdot T_{flash} \quad (27)$$

$$\text{where } T_{flash} = 0 \text{ if } t < t_{flash} \quad (28)$$

$$\text{and } T_{flash} = 1 \text{ if } t \geq t_{flash} \quad (29)$$

For the photoproducts:

$$\frac{d[CaPP1]}{dt} = k_{on(CaDMn)} \cdot [Ca^{2+}] \cdot [PP1] - k_{off(CaPP1)} \cdot [CaPP1] + J_{fast(CaDMn)} + J_{slow(CaDMn)} \quad (30)$$

$$\frac{d[CaPP2]}{dt} = k_{on(CaDMn)} \cdot [Ca^{2+}] \cdot [PP2] - k_{off(CaPP2)} \cdot [CaPP2] \quad (31)$$

$$\frac{d[MgPP1]}{dt} = k_{on(MgDMn)} \cdot [Mg^{2+}] \cdot [PP1] - k_{off(MgPP)} \cdot [MgPP1] \quad (32)$$

$$\frac{d[MgPP2]}{dt} = k_{on(MgDMn)} \cdot [Mg^{2+}] \cdot [PP2] - k_{off(MgPP)} \cdot [CaPP2] + J_{fast(MgDMn)} + J_{slow(MgDMn)} \quad (33)$$

$$\begin{aligned} \frac{d[PP1]}{dt} = & -k_{on(CaDMn)} \cdot [Ca^{2+}] \cdot [PP1] + k_{off(CaPP1)} \cdot [CaPP1] \\ & - k_{on(MgDMn)} \cdot [Mg^{2+}] \cdot [PP1] + k_{off(MgPP)} \cdot [MgPP1] \\ & + J_{fast(CaDMn)} + J_{slow(CaDMn)} \end{aligned} \quad (34)$$

$$\begin{aligned} \frac{d[PP2]}{dt} = & -k_{on(CaDMn)} \cdot [Ca^{2+}] \cdot [PP2] + k_{off(CaPP2)} \cdot [CaPP2] \\ & - k_{on(MgDMn)} \cdot [Mg^{2+}] \cdot [PP2] + k_{off(MgPP)} \cdot [MgPP2] \\ & + 2 \cdot J_{fast(DMn)} + 2 \cdot J_{slow(DMn)} + J_{fast(MgDMn)} + J_{slow(MgDMn)} \end{aligned} \quad (35)$$

For the dye

$$\frac{d[CaD]}{dt} = k_{on(D)} \cdot [Ca^{2+}] \cdot [D] - k_{off(D)} \cdot [CaD] \quad (36)$$

$$[D] = [D]_T - [CaD] \quad (37)$$

For  $Ca^{2+}$  and  $Mg^{2+}$

$$[Ca^{2+}] = [Ca^{2+}]_T - [CaDMn] - [CaPP1] - [CaPP2] \quad (38)$$

$$[Ca^{2+}]_T = [Ca^{2+}]_{t=0} + [CaDMn]_{t=0} \quad (39)$$

$$[Mg^{2+}] = [Mg^{2+}]_T - [MgDMn] - [MgPP1] - [MgPP2] \quad (40)$$

*Initial conditions*

$$[DMn]_{t=0} = [DMn]_T - [CaDMn]_{t=0} - [MgDMn]_{t=0} \quad (41)$$

$$[CaDMn]_{t=0} = \frac{K_{d(MgDMn)} \cdot [Ca^{2+}]_{t=0}}{K_{d(MgDMn)} \cdot [Ca^{2+}]_{t=0} + K_{d(CaDMn)} \cdot [Mg^{2+}]_{t=0} + K_{d(CaDMn)} \cdot K_{d(MgDMn)}} \cdot [DMn]_T \quad (42)$$

$$[MgDMn]_{t=0} = \frac{K_{d(CaDMn)} \cdot [Mg^{2+}]_{t=0}}{K_{d(CaDMn)} \cdot [Mg^{2+}]_{t=0} + K_{d(MgDMn)} \cdot [Ca^{2+}]_{t=0} + K_{d(CaDMn)} \cdot K_{d(MgDMn)}} \cdot [DMn]_T \quad (43)$$

$$[Mg^{2+}] = \frac{K_{d(CaDMn)} \cdot [Mg^{2+}]_T - K_{d(MgDMn)} \left( K_{d(CaDMn)} - [Ca^{2+}] - [DMn]_T \right) + X}{2K_{d(CaDMn)}} \quad (44a)$$

$$X = \sqrt{K_{d(CaDMn)}^2 \left( [Mg^{2+}]_T \left( [Mg^{2+}]_T + 2 \cdot K_{d(MgDMn)} - 2 \cdot [DMn]_T \right) + [DMn]_T \left( [DMn]_T + 2 \cdot K_{d(MgDMn)} \right) + K_{d(MgDMn)}^2 \right) + K_{d(MgDMn)} \cdot [Ca^{2+}] \left( K_{d(MgDMn)} \cdot [Ca^{2+}] + 2 \cdot K_{d(CaDMn)} \left( [Mg^{2+}]_T + K_{d(MgDMn)} [DMn]_T \right) \right)} \quad (44b)$$

(also see appendix A, see online journal)

Initially there are no photoproducts

$$[CaD]_{t=0} = \frac{[Ca^{2+}]_{t=0}}{K_{d(D)} + [Ca^{2+}]_{t=0}} \cdot [D]_T \quad (45)$$

*Model output*

$$\frac{\Delta F}{F} = \frac{\Delta F(t)}{F_{t=0}} = \frac{[CaD] \cdot (F_{ratio} - 1) + [D]_T}{[CaD]_{t=0} \cdot (F_{ratio} - 1) + [D]_T} \quad (46)$$
