# Supplementary material
Source: PubMed Central journal article supplement (PMC1305669)
Supplement: biophysj_104.057745_3.pdf [file biophysj_104.057745_3.pdf]

## Appendix A

For the steady state equilibrium we considered equation 1 to express  $[CaDMn]/ [DMn]_T$  as a function of  $[Ca^{2+}]$ ,  $[Ca^{2+}]_T$ ,  $[Mg^{2+}]_T$ ,  $[DMn]_T$ ,  $K_{d(CaDMn)}$  and,  $K_{d(MgDMn)}$ .

The fraction of  $Ca^{2+}$  bound DMn is:

$$\frac{[CaDMn]}{[DMn]_T} = \frac{[CaDMn]}{[CaDMn] + [MgDMn] + [DMn]} \quad (1)$$

where

$$[CaDMn] = \frac{[Ca^{2+}] \cdot [DMn]}{K_{d(CaDMn)}} \quad (2)$$

$$[MgDMn] = \frac{[Mg^{2+}] \cdot [DMn]}{K_{d(MgDMn)}} \quad (3)$$

which gives:

$$\frac{[CaDMn]}{[DMn]_T} = \frac{K_{d(MgDMn)} \cdot [Ca^{2+}]}{K_{d(MgDMn)} \cdot [Ca^{2+}] + K_{d(CaDMn)} \cdot [Mg^{2+}] + K_{d(CaDMn)} \cdot K_{d(MgDMn)}} \quad (4)$$

Similar to equation 6 we derive

$$\frac{[MgDMn]}{[DMn]_T} = \frac{K_{d(CaDMn)} \cdot [Mg^{2+}]}{K_{d(MgDMn)} \cdot [Ca^{2+}] + K_{d(CaDMn)} \cdot [Mg^{2+}] + K_{d(CaDMn)} \cdot K_{d(MgDMn)}} \quad (5)$$

$$[MgDMn] = [Mg^{2+}]_T - [Mg^{2+}] \quad (6)$$

Equations 7 and 8 can be rewritten as (for this, we used MatLab student version 5.3):

$$[Mg^{2+}] = \frac{K_{d(CaDMn)} \cdot [Mg^{2+}]_T - K_{d(MgDMn)} (K_{d(CaDMn)} - [Ca^{2+}] - [DMn]_T) + X}{2K_{d(CaDMn)}} \quad (7a)$$

where

$$X = \sqrt{K_{d(CaDMn)}^2 ([Mg^{2+}]_T ([Mg^{2+}]_T + 2 \cdot K_{d(MgDMn)} - 2 \cdot [DMn]_T) + [DMn]_T ([DMn]_T + 2 \cdot K_{d(MgDMn)}) + K_{d(MgDMn)}^2) + K_{d(MgDMn)} \cdot [Ca^{2+}] (K_{d(MgDMn)} \cdot [Ca^{2+}] + 2 \cdot K_{d(CaDMn)} ([Mg^{2+}]_T + K_{d(MgDMn)} [DMn]_T))} \quad (9b)$$

Substitution of  $[Mg^{2+}]$  in eq. 6 with eq. 9 gives  $[CaDMn]/[DMn]_T$  as a function of the measured parameter  $[Ca^{2+}]$ , and the known parameters  $[Ca^{2+}]_T$ ,  $[Mg^{2+}]_T$  and,  $[DMn]_T$  and the unknown parameters  $K_{d(CaDMn)}$  and  $K_{d(MgDMn)}$ .
